# Supplementary material for: The DECAF Score: predicting hospital mortality in exacerbations of chronic obstructive pulmonary disease
Source: HighWire-hosted journal article supplement (doi:10.1136/thoraxjnl-2012-202103), 2012-08-15
Supplement: thoraxjnl-2012-202103-s1.pdf [file thoraxjnl-2012-202103-s1.pdf]

**THE DECAF SCORE: A SIMPLE, EFFECTIVE PROGNOSTIC TOOL  
IN EXACERBATIONS OF COPD REQUIRING HOSPITALIZATION**

J. Steer<sup>1</sup>, G.J.Gibson<sup>2</sup>, S.C.Bourke<sup>1,2</sup>

**Online data supplement**

## METHODS

### Data collection

Table E1 (online). Data collected

| Sociodemographic details            | Pre-admission status                                           | Admission clinical data                |
|-------------------------------------|----------------------------------------------------------------|----------------------------------------|
| Age                                 | Self-reported annual frequency of AECOPD                       | Heart rate                             |
| Gender                              | Number of admissions in the previous year                      | Blood pressure                         |
| Residence prior to hospitalisation  | Number of previous episodes of assisted ventilation for AECOPD | Respiratory rate                       |
| Need for formal social support      | eMRCD <sup>†</sup>                                             | Temperature                            |
| Smoking status*                     | Recent (within 3 months) unintentional weight loss, %          | Arterial oxygen saturation             |
| Smoking load (cigarette pack years) | Spirometry (if performed within 2 years)‡                      | BMI**                                  |
|                                     | Comorbidity                                                    | Purulent sputum expectoration          |
|                                     | Maintenance medications                                        | Acute confusional state                |
|                                     |                                                                | Cough effectiveness <sup>§</sup>       |
|                                     |                                                                | Blood biochemistry <sup>§</sup>        |
|                                     |                                                                | Blood haematology <sup>£</sup>         |
|                                     |                                                                | Arterial blood gas analysis            |
|                                     |                                                                | Presence of radiographic consolidation |

\*current or former (abstinence for at least 3 months) smoker; †extended MRC Dyspnoea Scale; ‡ all patients had documented airflow obstruction on spirometry but only spirometry performed within 2 years of admission was eligible for analysis; \*\* if not performed during hospital admission and no recent weight loss reported, BMI from recent (within 3 months) clinic visit was accepted; § 'effective cough' = able to cough but could not generate sufficient force to mobilise secretions and fully expectorate sputum, 'ineffective cough' = unable to generate any significant force to their cough; § serum sodium, urea, potassium, creatinine, glucose and C-reactive protein concentrations; £ haemoglobin concentration, total white cell count, neutrophil leucocyte count, eosinophil count

Table E2 (online) The traditional [1] (MRCD) and extended [2] (eMRCD) versions of the MRC Dyspnoea Scores

| <b>Limitation due to breathlessness</b>                                | <b>MRCD</b> | <b>eMRCD</b> |
|------------------------------------------------------------------------|-------------|--------------|
| Breathless only with strenuous exercise                                |             | 1            |
| Breathless when hurrying on the level or walking up a slight hill      |             | 2            |
| Walks slower than peers, or stops when walking on the flat at own pace |             | 3            |
| Stops after walking 100m, or for a few minutes, on the level           |             | 4            |
| Too breathless to leave the house                                      | 5           |              |
| <b>&amp; independent in washing and / or dressing</b>                  |             | <b>5a</b>    |
| <b>&amp; dependent in washing and dressing</b>                         |             | <b>5b</b>    |

**Explanatory notes**

- The patient was asked to rate his or her level of breathlessness on a good day within the preceding 3 months, not at the time of assessment.
- A patient only achieves a higher grade if the symptoms are as bad as defined by that higher grade: for example, if symptoms are worse than defined in eMRCD 3, but not as bad as eMRCD 4, the grade remains eMRCD 3
- A key distinction is between eMRCD 4 and eMRCD 5a/5b: the score is 5a or 5b only if the patient cannot leave the house without assistance. For example, if a patient can walk only 30 to 40 yards but can leave the house unaided, the score is eMRCD 4. If a patient can walk only 5 to 10 yards and requires a wheelchair otherwise, the score is eMRCD 5a or 5b.

## RESULTS

Table E3 (online) Comparisons between patient characteristics admitted to the two study hospitals

| Variable                                          | Hospital 1* (n=505) | Hospital 2* (n=415) |
|---------------------------------------------------|---------------------|---------------------|
| <b>Sociodemographic details,</b>                  |                     |                     |
| Age (years)                                       | 73.1 (10.4)         | 73.1 (9.7)          |
| Female, %                                         | 54.5                | 53.3                |
| <b>Markers of disease severity,</b>               |                     |                     |
| Number of AECOPD in previous year, median (IQR)   | 3 (1 to 4)          | 3 (2 to 4)          |
| FEV <sub>1</sub> % predicted                      | 44.8 (16.7)†        | 42.1 (17.6)†        |
| MRCd, median (IQR)                                | 4 (3 to 5)          | 4 (4 to 5)          |
| BMI, kgm <sup>-2</sup>                            | 24.4 (6.2)          | 24.7 (6.4)          |
| <b>Events during hospital stay,</b>               |                     |                     |
| Acidaemic respiratory failure during admission, % | 25.3                | 31.1                |
| Assisted ventilation, %                           | 21.9                | 21.4                |
| In-hospital mortality, %                          | 10.3%               | 10.6%               |

\* values quoted are mean (SD) unless otherwise stated; † significant difference between hospitals, p=0.016

Table E4 (online) Independent predictors of in-hospital mortality according to the “full” multivariate regression

| Variable                              | B     | S.E. | OR (95% CI)          | p value |
|---------------------------------------|-------|------|----------------------|---------|
| eMRCD                                 | 0.89  | 0.14 | 2.43 (1.83 – 3.22)   | <0.001  |
| CXR consolidation                     | 1.16  | 0.28 | 3.18 (1.86 – 5.47)   | <0.001  |
| Eosinophil count, x10 <sup>9</sup> /L | -4.89 | 1.41 | 0.008 (0.000 – 0.12) | <0.001  |
| Temperature, °C                       | -0.51 | 0.15 | 0.60 (0.45 – 0.80)   | <0.001  |
| Atrial fibrillation                   | 1.01  | 0.33 | 2.74 (1.43 – 5.28)   | 0.003   |
| Ineffective cough                     | 0.97  | 0.33 | 2.64 (1.39 – 5.01)   | 0.003   |
| Age, years                            | 0.04  | 0.02 | 1.04 (1.00 – 1.07)   | 0.026   |
| Cerebrovascular disease               | 0.68  | 0.33 | 1.98 (1.05 – 3.75)   | 0.035   |
| Albumin, g/L                          | -0.06 | 0.03 | 0.95 (0.90 – 1.00)   | 0.049   |
| H <sup>+</sup> , nmol/L               | 0.02  | 0.01 | 1.02 (1.00 – 1.04)   | 0.049   |
| Glucose, mmol/L                       | 0.07  | 0.04 | 1.08 (1.00 – 1.16)   | 0.051   |
| Intercept                             | 9.73  | 5.66 |                      |         |

S.E. – standard error; OR – odds ratio; CI – confidence interval

Nagelkerke's R<sup>2</sup> = 0.428; HLGFT = 0.379. AUROC (95% CI) for in-hospital mortality = 0.90 (0.87 to 0.93)

Odds of dying =  $e^{\lambda} = [9.73 + (0.89 \times \text{eMRCD}) - (0.51 \times \text{temperature}) + (0.021 \times \text{Hydrogen ions}) + (0.036 \times \text{age}) - (4.89 \times \text{eosinophil count}) + (0.68 \text{ if cerebrovascular disease}) + (1.01 \text{ if atrial fibrillation}) + (1.16 \text{ if consolidation}) + (0.97 \text{ if cough ineffective}) + (0.074 \times \text{glucose}) - (0.055 \times \text{albumin})]$

## References (for online supplement)

1. Bestall JC, Paul EA, Garrod R, Garnham R, Jones PW, Wedzicha JA. Usefulness of the Medical Research Council (MRC) dyspnoea scale as a measure of disability in patients with chronic obstructive pulmonary disease. *Thorax* 1999;**54**(7):581-6.
2. Steer J, Norman EM, Afolabi OA, Gibson GJ, Bourke SC. Dyspnoea severity and pneumonia as predictors of in-hospital mortality and early readmission in acute exacerbations of COPD. *Thorax* 2012;**67**(2):117-21.
